# Supplementary material
Source: PubMed Central journal article supplement (PMC8251651)
Supplement: jamaoncol-e212049-s001.pdf [file jamaoncol-e212049-s001.pdf]

## Supplementary Online Content

Bartels F, Wandrey MM, Aigner A, et al. Association between neuronal autoantibodies and cognitive impairment in patients with lung cancer. *JAMA Oncol*. Published online July 1, 2021. doi:10.1001/jamaoncol.2021.2049

**eMethods 1.** Patients

**eMethods 2.** Neuronal Autoantibody Analysis

**eMethods 3.** Neuropsychological Tests

**eTable 1.** Prevalence of Brain Tissue Staining in Patients With Lung Cancer: SCLC vs NSCLC

**eTable 2.** Demographic Characteristics of Patients by Antibody

**eTable 3.** Demographic Characteristics of Patients With Cognitive Testing Results

**eTable 4.** Demographic Characteristics of Tested Patients by Antibody

**eTable 5.** Demographic Characteristics of Patients by Cognitive Impairment

**eTable 6.** Cognitive Test Scores of Patients With SCLC: AIC Antibodies vs No Antibodies

**eTable 7.** Cognitive Test Scores of Patients With NSCLC: VLMT IgA NMDAR Antibodies vs No Antibodies

**eTable 8.** Cognitive Test Scores of All Patients With Lung Cancer: Unknown Antibodies vs No Antibodies

**eTable 9.** Model Adjusted for Opioid Therapy

**eTable 10.** Neuronal Autoantibodies and Neurological Deficits in Patients With Lung Cancer

**eFigure 1.** Antibody Prevalence

**eFigure 2.** Antibody Prevalence by Sex

**eFigure 3.** Cognitive Impairment by Sex

**eFigure 4.** Mental Health and Depression Scale Scores and Cognitive Impairment

**eFigure 5.** Cognitive Domain Deficits: Working Memory, Visuospatial Memory, and Executive Function

**eFigure 6.** Verbal Memory Performance in Patients With IgA NMDAR Antibodies

**eFigure 7.** Neurological Deficits

**eReferences**

This supplementary material has been provided by the authors to give readers additional information about their work.

## **eMethods 1. Patients**

Patients were only included and considered for the study when they were able to give informed consent to participate in the study. Patients with both SCLC and NSCLC were grouped as SCLC as this was medically and biologically considered the predominant tumor type at the time of study inclusion.

All patients who were considered for the study underwent a detailed and extensive neurological exam. In case of new neurological deficits identified as part of this exam, further diagnostic work-up including brain MRI scans were performed. Any sign of brain metastasis or new lesion identified here led to exclusion of the patient from neuropsychological evaluation.

Exclusion criteria for neuropsychological testing included presence of clinical factors with potential effect on cognitive function, age over 80 years, decreased alertness, or ECOG status of 4 and higher: 27 patients were either subjectively or objectively evaluated not fit for further testing (ECOG of 4 or higher, reduced alertness or declined further tests), and 43 patients had potential confounding factors for cognitive impairment: brain metastases (n=15), history of severe neurological or psychiatric diseases with potential effect on cognition (stroke, epilepsy, dementia, severe depression (n=13), history of cranial irradiation (n=13), and two patients were excluded due to age over 80 years. The initial exclusion criteria for time after surgery were set to <5 days. However, the actual median time from surgery to neuropsychological testing was 7 months. Only 4 patients were tested less than one month post-surgery (median 6 days (range 5-8)). We did not find any associations of surgery with cognitive impairment in our sample.

All patients were tested in one session on the same day with the same test order. The number of tests and test duration is similar to that of a neuropsychological evaluation applied in the clinical routine.

## **eMethods 2. Neuronal Autoantibody Analysis**

Antibody detection was performed using well-established commercial assays including cell-based assays (CBA) and frozen brain tissue sections using immunohistochemistry (IHC) (Institute of Experimental Immunology, Euroimmun AG, Lübeck, Germany). Briefly, neuronal antibodies were detected by indirect immunofluorescence using BIOCHIP mosaics™: BIOCHIPS contained both frozen brain tissue sections (rat hippocampus, rat cerebellum, monkey cerebellum) and different fixed recombinant HEK293-cells each expressing a single neuronal antigen (NMDAR-NR1a/NR1a, GABA-b (GABAR-B1/B2), GABA-a (GABARA1+GABARB3), AQP4, LGI1, CASPR2, GluRD2, MOG, DPPX, IgLON5, AMPA1/2, GRM1, GRM5, pre-GLRA1b, Flotilin, DNER, AT1A3, Neurochondrin, Yo, ZIC4, ARHGAP26, GAD65, GAD67, Amphiphysin, CV2, Hu, Ri, CARPVIII, ITPR1, Homer3, Recoverin, Ma2). Biochip mosaics were incubated with different dilutions of patients' serum (initial dilution 1:10), washed, and incubated with fluorescein-labelled anti-human immunoglobulin (anti-IgG, in addition anti-IgM and -IgA for NMDAR) before evaluating fluorescence comparing against empty-vector transfected cells as negative control. Immunoblot assays (EUROLINE) were additionally used to confirm CBA or IHC results for intracellular antigens (Amphiphysin, CV2, Ma2, Ri, Yo, Hu, Recoverin, SOX1, Zic4, GAD65, DNER).

### **eMethods 3. Neuropsychological Tests**

Cognitive function was assessed status using a battery of ten standardized neuropsychological tests covering all cognitive domains: Verbal Learning and Memory Test (VLMT), a German version of the Rey Auditory-Verbal Learning Test (RAVLT) for verbal short-term and long-term memory;<sup>1</sup> Rey-Osterrieth Complex Figure test (ROCF) for visuospatial memory;<sup>2</sup> the digit span forward and backward task, a component of the Wechsler Memory Scale (WMS), for short-term and working memory; the computerized test battery for attention (Testbatterie für Aufmerksamkeit, TAP) evaluating attention (TAP alertness and TAP divided attention) and executive function (TAP Go/NoGo)<sup>3</sup> with the additional the Stroop color-word test. Semantic fluency was examined using the Regensburger word fluency test.<sup>4</sup> Fluid intelligence and abstract reasoning abilities were assessed by the subtest 3 of the Leistungsprüfungssystem (LPS)<sup>5</sup>, a German equivalent of Raven's Progressive Matrices. Crystallized intelligence was estimated using the Mehrfachwahl-Wortschatz-Intelligenztest-A (MWT-A)<sup>6</sup>, a German equivalent of the National Adult Reading Test (NART).

Patient-reported outcome measures (PROMs) included the FACIT Fatigue Scale (Version 4), the Short-Form-12 (SF-12) assessment scale, a brief version of the Short-Form-36 (SF-36) Health Survey Scale, evaluating physical and mental health-related quality of life, the Beck Depression Inventory-Fast Screen (BDI-FS), and a screen for subjective cognitive deficits. The Eastern Cooperative Oncology Group (ECOG) Performance Status measuring activities of daily living was completed by the investigator performing the examination.

**eTable 1.** Prevalence of Brain Tissue Staining in Patients With Lung Cancer: SCLC vs NSCLC

|                                    | All patients (n=167) |      | SCLC patients (n=40)* |      | NSCLC patients (n=127) |      |
|------------------------------------|----------------------|------|-----------------------|------|------------------------|------|
|                                    | No. *                | % *  | No. *                 | % *  | No. *                  | % *  |
| <b>Tissue staining positive</b>    | 38                   | 22.8 | 13                    | 32.5 | 25                     | 19.7 |
| Negative on cell-based assay (CBA) | 28                   | 16.8 | 4                     | 10.0 | 24                     | 18.9 |
| <b>Tissue type</b>                 |                      |      |                       |      |                        |      |
| Hippocampus (rat)                  | 21                   | 12.6 | 11                    | 27.5 | 10                     | 7.9  |
| Cerebellum (rat)                   | 31                   | 18.6 | 11                    | 27.5 | 20                     | 15.7 |
| Cerebellum (monkey)                | 34                   | 20.4 | 12                    | 30.0 | 22                     | 17.3 |
| <b>Number of stained tissues†</b>  |                      |      |                       |      |                        |      |
| One                                | 7                    | 4.2  | 1                     | 2.5  | 6                      | 4.7  |
| Two                                | 14                   | 8.4  | 3                     | 7.5  | 11                     | 8.7  |
| Three                              | 17                   | 10.2 | 9                     | 22.5 | 8                      | 6.3  |

\*Numbers do not add up due to combination of tissue staining. †Combinations of tissue staining include: One tissue: CM (n=4), CR (n=1), HR (n=2). Two tissues: CR+CM (n=12), CR+HR (n=1), CM+HR (n=1). (CM=Cerebellum monkey, CR=Cerebellum rat, HR=Hippocampus rat).

**eTable 2.** Demographic Characteristics of Patients by Antibody

| Lung Cancer Patients (n=167)                     | Total (n=167)* | C- (n=107)   | AICAbs (n=17)             | NSAbs (n=18) | uAbs (n=28)  |
|--------------------------------------------------|----------------|--------------|---------------------------|--------------|--------------|
| <b>Age</b>                                       |                |              |                           |              |              |
| Median (range)                                   | 66.0 (38-88)   | 67.0 (38-88) | 64.0 (51-80)              | 63.5 (47-79) | 66.0 (54-79) |
| <b>Sex</b>                                       |                |              |                           |              |              |
| Male                                             | 105 (62.9)     | 63 (58.9)    | 12 (70.6)                 | 14 (77.8)    | 18 (64.3)    |
| Female                                           | 62 (37.1)      | 44 (41.1)    | 5 (29.4)                  | 4 (22.2)     | 10 (35.7)    |
| <b>Lung Cancer Subtype</b>                       |                |              |                           |              |              |
| Small Cell Lung Cancer (SCLC)                    | 38 (22.8)      | 20 (18.7)    | 12 (70.6)*** <sup>1</sup> | 4 (22.2)     | 4 (14.3)     |
| Non Small Cell Lung Cancer (NSCLC)               |                |              |                           |              |              |
| <i>Adenocarcinoma</i>                            | 61 (36.5)      | 39 (36.4)    | 3 (17.6)                  | 9 (50.0)     | 11 (39.3)    |
| <i>Squamous Cell Carcinoma</i>                   | 43 (25.7)      | 28 (26.2)    | 2 (11.8)                  | 2 (11.1)     | 11 (39.3)    |
| <i>Other</i> <sup>4</sup>                        | 22 (13.8)      | 17 (15.9)    | 0 (0.0)                   | 3 (16.7)     | 2 (7.1)      |
| Combined Carcinoma (SCLC+NSCLC)                  | 3 (1.8)        | 3 (2.8)      | 0 (0.0)                   | 0 (0.0)      | 0 (0.0)      |
| <b>Clinical Stage (UICC 2010)</b>                |                |              |                           |              |              |
| Stage I                                          | 17 (10.2)      | 13 (12.1)    | 0 (0.0)                   | 0 (0.0)      | 4 (14.3)     |
| Stage II                                         | 12 (7.2)       | 5 (4.7)      | 0 (0.0)                   | 1 (5.6)      | 6 (21.4)     |
| Stage III                                        | 42 (25.1)      | 24 (22.4)    | 10 (58.8)* <sup>2</sup>   | 6 (33.3)     | 4 (14.3)     |
| Stage IV (metastases)                            | 93 (55.7)      | 64 (59.8)    | 7 (41.2)                  | 11 (61.1)    | 12 (42.9)    |
| unknown                                          | 3 (1.8)        | 1 (0.9)      | 0 (0.0)                   | 0 (0.0)      | 2 (7.1)      |
| <b>Site of metastases</b>                        |                |              |                           |              |              |
| Lung / Pleura / Pericardium (M1a)                | 67 (40.1)      | 47 (43.9)    | 5 (29.4)                  | 6 (33.3)     | 10 (34.5)    |
| Brain                                            | 13 (7.8)       | 8 (7.5)      | 1 (5.9)                   | 2 (11.1)     | 2 (6.9)      |
| Other distant metastases (M1b) <sup>5</sup>      | 56 (33.5)      | 38 (35.5)    | 5 (29.4)                  | 7 (38.9)     | 7 (25.0)     |
| <b>Treatment</b>                                 |                |              |                           |              |              |
| Treatment naive                                  | 45 (26.9)      | 31 (29.0)    | 3 (17.6)                  | 3 (16.7)     | 8 (27.6)     |
| Chemotherapy (prior and/or current) <sup>6</sup> | 91 (54.5)      | 57 (53.3)    | 12 (70.6)                 | 12 (66.7)    | 13 (46.4)    |
| Radiotherapy (prior and/or current)              |                |              |                           |              |              |
| <i>Local radiation (primary tumor)</i>           | 47 (28.1)      | 28 (26.2)    | 5 (29.4)                  | 7 (38.9)     | 9 (32.1)     |
| <i>Brain radiation</i>                           | 10 (6.0)       | 7 (6.5)      | 1 (5.9)                   | 1 (5.6)      | 1 (3.6)      |
| Surgery of primary tumor <sup>7</sup>            | 38 (22.8)      | 21 (19.6)    | 4 (23.5)                  | 7 (38.9)     | 7 (24.1)     |

|                                                   |             |            |           |                        |           |
|---------------------------------------------------|-------------|------------|-----------|------------------------|-----------|
| Surgery of metastases                             | 5 (3.0)     | 5 (4.7)    | 0 (0.0)   | 0 (0.0)                | 0 (0.0)   |
| Targeted Therapy <sup>8</sup>                     | 8 (4.8)     | 4 (3.7)    | 0 (0.0)   | 3 (16.7)* <sup>3</sup> | 1 (3.4)   |
| Immunotherapy (IVIGs)                             | 3 (1.8)     | 1 (0.9)    | 1 (5.9)   | 1 (5.6)                | 0 (0.0)   |
| <b>Time since initial diagnosis (months)</b>      |             |            |           |                        |           |
| Median (range / IQR)                              | 2.0 (0-123) | 0.0 (0-4)  | 0.0 (0-2) | 0.0 (0-10)             | 0.0 (0-7) |
| <b>Other current/ prior malignancy in history</b> |             |            |           |                        |           |
| Yes                                               | 38 (22.8)   | 25 (23.4)  | 4 (23.5)  | 5 (27.8)               | 6 (21.4)  |
| <i>Lung Cancer<sup>9</sup></i>                    | 10 (6.0)    | 6 (5.6)    | 1 (5.9)   | 1 (5.6)                | 3 (10.7)  |
| <i>Other type of malignancy</i>                   | 28 (16.8)   | 19 (17.8)  | 3 (17.6)  | 4 (22.2)               | 3 (10.7)  |
| <b>Medical history</b>                            |             |            |           |                        |           |
| Smoking (n=159) <sup>10</sup>                     | 148 (93.1)  | 93 (93.9)  | 15 (88.2) | 17 (94.4)              | 26 (92.9) |
| <i>Pack years (median, range)</i>                 | 40 (5-100)  | 40 (6-100) | 45 (5-90) | 35 (20-55)             | 47 (5-90) |
| Arterial hypertension                             | 110 (65.9)  | 69 (65.5)  | 11 (64.7) | 13 (72.2)              | 19 (67.9) |
| Pulmonary disease                                 | 90 (53.9)   | 58 (54.2)  | 8 (47.1)  | 10 (55.6)              | 15 (53.6) |
| Cardiovascular disease                            | 84 (50.3)   | 54 (50.5)  | 7 (41.2)  | 6 (33.3)               | 19 (67.9) |
| Gastrointestinal disease                          | 51 (30.5)   | 29 (27.1)  | 5 (29.4)  | 6 (33.3)               | 11 (39.3) |
| Neurologic disease                                | 43 (25.7)   | 28 (26.2)  | 8 (47.1)  | 6 (33.3)               | 3 (10.7)  |
| Diabetes mellitus                                 | 42 (25.1)   | 30 (28.0)  | 5 (29.4)  | 4 (22.2)               | 5 (17.9)  |
| Urologic/ Nephrologic disease                     | 41 (24.6)   | 26 (24.3)  | 5 (29.4)  | 5 (27.8)               | 5 (17.9)  |
| Thyroid disease                                   | 39 (23.4)   | 25 (23.4)  | 6 (35.3)  | 5 (27.8)               | 5 (17.9)  |
| Psychiatric disease                               | 16 (9.6)    | 10 (9.3)   | 2 (11.8)  | 1 (5.6)                | 4 (14.3)  |
| Autoimmune disease                                | 9 (5.4)     | 3 (2.8)    | 2 (11.8)  | 1 (5.6)                | 3 (10.7)  |
| Rheumatic disease                                 | 6 (3.6)     | 2 (1.9)    | 1 (5.9)   | 1 (5.6)                | 2 (7.1)   |
| Paraneoplastic disease                            | 10 (6.0)    | 3 (2.8)    | 6 (35.3)  | 1 (5.6)                | 1 (3.6)   |
| <i>Antibody-related PNS</i>                       | 6 (3.6)     | 1 (0.9)    | 5 (29.4)  | 1 (5.6)                | 0 (0.0)   |
| <i>SIADH</i>                                      | 2 (1.2)     | 1 (0.9)    | 1 (5.9)   | 0 (0.0)                | 0 (0.0)   |
| <i>Hypercalcemia</i>                              | 2 (1.2)     | 1 (0.9)    | 0 (0.0)   | 0 (0.0)                | 1 (3.6)   |
|                                                   |             |            |           |                        |           |

C-: negative control group (cell based assay and immunohistochemistry negative. AICAbs: patients positive for intracellular antibodies in cell based assay. NSAbs: patients positive for neuronal surface antibodies in cell based assay. uAbs: patients negative in cell based assay, but with positive immunohistochemistry (unidentified target antigen). Numbers do not add up due to combination of antibodies (2 patients are positive for both AICAbs and NSAbs). Significant differences between groups are marked with asterisks (\*<sup>1</sup> p<0.001, \*<sup>2</sup> p=0.010, \*<sup>3</sup> p=0.037) P-values are computed using chi-square test comparing against the C- group. <sup>4</sup>Large Cell Carcinoma 2 (1.2), Large Cell Neuroendocrine Carcinoma 1 (0.6), Typical Carcinoid Tumor 2 (1.2), Atypical Carcinoid Tumor 1 (1.2), NSCLC not otherwise specified 16 (9.6); <sup>5</sup>Other distant metastases: Liver 24 (14.4), Bone 21 (12.6), Distant lymph nodes 20 (12.0), Adrenal gland 17 (10.2), Soft tissue 7 (4.2), Pancreas 1 (0.6), Spleen 1 (0.6). <sup>6</sup>Current chemotherapy 58 (34.7); <sup>7</sup>Resection margin R0 31 (18.6), Resection margin R1 3 (1.8), unknown 4 (2.4); <sup>8</sup>Bevacizumab (VEGF-antibody) 3 (1.8), Nintedanib (Tyrosinkinase inhibitor) 2 (1.2), other 3 (1.8) (Erlotinib/Nivolumab; Cetuximab; Everolimus); <sup>9</sup>In History (cured) 6 (3.6), Synchronous Second Carcinoma 4 (2.4); <sup>10</sup>Data on smoking are missing for 8 patients.



**eTable 3.** Demographic Characteristics of Patients With Cognitive Testing Results (n = 97)

|                                           | <b>SCLC (n=26)</b> | <b>NSCLC (n=71)</b> |
|-------------------------------------------|--------------------|---------------------|
|                                           | <b>No. (%)</b>     | <b>No. (%)</b>      |
| <b>Age (years)</b>                        |                    |                     |
| Mean (SD)                                 | 63.0 (8.1)         | 63.5 (9.2)          |
| <b>Sex</b>                                |                    |                     |
| Male                                      | 16 (61.5)          | 40 (56.3)           |
| <b>Ethnicity</b>                          |                    |                     |
| Caucasian                                 | 25 (96.2)          | 71 (100)            |
| African                                   | 1 (3.8)            | 0 (0.0)             |
| <b>Non-Small Cell Lung Cancer Subtype</b> |                    |                     |
| Adenocarcinoma                            |                    | 37 (52.1)           |
| Squamous Cell Carcinoma                   |                    | 21 (29.6)           |
| Typical Carcinoid Tumor                   |                    | 2 (2.8)             |
| Atypical Carcinoid Tumor                  |                    | 1 (1.4)             |
| NSCLC not otherwise specified             |                    | 10 (14.1)           |
| <b>Clinical Stage (UICC 2010)</b>         |                    |                     |
| Stage I                                   | 0 (0.0)            | 13 (18.3)           |
| Stage II                                  | 1 (3.8)            | 7 (9.9)             |
| Stage III                                 | 13 (50.0)          | 14 (19.7)           |
| Stage IV (non-cerebral metastases)        | 11 (42.3)          | 36 (50.7)           |
| Lung or pleural metastases (M1a)          | 4 (15.4)           | 20 (28.2)           |
| Other distant metastases (M1b)            | 7 (26.9)           | 16 (22.5)           |
| unknown                                   | 1 (3.8)            | 1 (1.4)             |
| <b>Treatment</b>                          |                    |                     |
| Treatment naive                           | 11 (42.3)          | 26 (36.6)           |
| Chemotherapy                              | 15 (57.7)          | 19 (26.8)           |
| Radiotherapy (radiation of primary tumor) | 8 (30.8)           | 18 (25.4)           |
| Surgery of primary tumor                  | 0 (0.0)            | 25 (35.2)           |
| Targeted Therapy <sup>1</sup>             | 0 (0.0)            | 3 (4.2)             |
| Immunotherapy                             | 1 (3.8)            | 1 (1.4)             |
| <b>Time since initial diagnosis (mth)</b> |                    |                     |
| Mean (SD)                                 | 1.9 (2.4)          | 6.5 (18.5)          |
| <b>Medical history</b>                    |                    |                     |

|                                                   |              |              |
|---------------------------------------------------|--------------|--------------|
| Smoking <sup>2</sup>                              | 23 (88.5)    | 61 (85.9)    |
| Arterial hypertension                             | 14 (53.8)    | 47 (66.2)    |
| Pulmonary disease                                 | 10 (38.5)    | 40 (56.3)    |
| Cardiovascular disease                            | 6 (23.1)     | 36 (50.7)    |
| Diabetes mellitus <sup>3</sup>                    | 5 (19.2)     | 20 (28.2)    |
| Thyroid disease                                   | 9 (34.6)     | 16 (22.5)    |
| Neurologic disease                                | 9 (34.6)     | 11 (15.5)    |
| Other malignancy (current/prior)                  | 5 (19.2)     | 12 (16.9)    |
| Psychiatric disease                               | 5 (19.2)     | 7 (9.9)      |
| Paraneoplastic disease <sup>4</sup>               | 6 (23.1)     | 1 (1.4)      |
| Autoimmune disease                                | 2 (7.7)      | 3 (4.2)      |
| <b>Sedating Medication at time of examination</b> |              |              |
| Yes                                               | 9 (34.6)     | 31 (43.7)    |
| <i>Opioid analgesics</i>                          | 5 (19.2)     | 24 (33.8)    |
| <i>Antidepressants</i>                            | 1 (3.8)      | 8 (11.3)     |
| <i>Sleeping drugs</i>                             | 2 (7.7)      | 6 (8.5)      |
| <i>Anticonvulsant drugs (co-analgesics)</i>       | 2 (7.7)      | 1 (1.4)      |
| <b>ECOG Performance status</b>                    |              |              |
| 0                                                 | 17 (65.4)    | 45 (63.4)    |
| 1                                                 | 6 (23.1)     | 14 (19.7)    |
| 2                                                 | 3 (11.5)     | 9 (12.7)     |
| 3                                                 | 0 (0.0)      | 3 (4.2)      |
| <b>FACIT Fatigue Score</b>                        |              |              |
| Mean (SD)                                         | 36.4 (10.1)  | 34.0 (11.6)  |
| <b>BDI-FS Depression Score</b>                    |              |              |
| Mean (SD)                                         | 2.0 (2.2)    | 2.3 (3.0)    |
| <b>SF-12 Physical Health Score</b>                |              |              |
| Mean (SD)                                         | 39.4 (10.2)  | 36.3 (10.6)  |
| <b>SF-12 Mental Health Score</b>                  |              |              |
| Mean (SD)                                         | 44.6 (12.6)  | 48.4 (11.6)  |
| <b>Years of education</b>                         |              |              |
| Mean (SD)                                         | 12.7 (2.1)   | 12.7 (2.3)   |
| <b>IQ (derived by MWT-A test score)</b>           |              |              |
| Mean (SD)                                         | 103.2 (15.2) | 107.9 (13.1) |

|                                                                                                                              |
|------------------------------------------------------------------------------------------------------------------------------|
| <sup>1</sup> One patient underwent targeted therapy against other tumor than lung cancer                                     |
| <sup>2</sup> Data on smoking are missing for five patients (1 SCLC/4 NSCLC). Eight patients (2 SCLC/6 NSCLC) are non-smokers |
| <sup>3</sup> DM Type 2 (N=22) (5 SCLC/17 NSCLC), DM Type 1 (N=2), DM Type 3 (N=1)                                            |
| <sup>4</sup> Paraneoplastic diseases include antibody-related PNS (N=4), SIADH (N=2) (all SCLC); Hypercalcemia (N=1) (NSCLC) |

**eTable 4.** Demographic Characteristics of Tested Patients by Antibody (n = 97)

| Tested Lung Cancer Patients (n=97)           | Total (n=97)* | C- (n=60)    | AICAbs (n=11) | NSAbs (n=10) | uAbs (n=17)  |
|----------------------------------------------|---------------|--------------|---------------|--------------|--------------|
| <b>Age</b>                                   |               |              |               |              |              |
| Median (range)                               | 64.0 (38-88)  | 64.5 (38-78) | 62.0 (51-80)  | 62.5 (47-72) | 65.0 (59-79) |
| <b>Sex</b>                                   |               |              |               |              |              |
| Male                                         | 56 (57.7)     | 33 (55.0)    | 7 (63.3)      | 7 (70.0)     | 10 (58.8)    |
| Female                                       | 41 (42.3)     | 27 (45.0)    | 4 (36.4)      | 3 (30.0)     | 7 (41.2)     |
| <b>Lung Cancer Subtype</b>                   |               |              |               |              |              |
| Small Cell Lung Cancer (SCLC)                | 24 (24.7)     | 11 (18.3)    | 8 (72.7)***1  | 2 (20.0)     | 4 (23.5)     |
| Non Small Cell Lung Cancer (NSCLC)           |               |              |               |              |              |
| <i>Adenocarcinoma</i>                        | 37 (38.1)     | 25 (41.7)    | 3 (27.3)      | 4 (40.0)     | 5 (29.4)     |
| <i>Squamous Cell Carcinoma</i>               | 21 (21.6)     | 12 (20.0)    | 0 (0.0)       | 2 (20.0)     | 7 (41.2)     |
| <i>Other</i> <sup>10</sup>                   | 13 (13.4)     | 10 (16.7)    | 0 (0.0)       | 2 (20.0)     | 1 (5.9)      |
| Combined Carcinoma (SCLC+NSCLC)              | 2 (2.1)       | 2 (3.3)      | 0 (0.0)       | 0 (0.0)      | 0 (0.0)      |
| <b>Clinical Stage (UICC 2010)</b>            |               |              |               |              |              |
| Stage I                                      | 13 (13.4)     | 9 (15.0)     | 0 (0.0)       | 0 (0.0)      | 4 (23.5)     |
| Stage II                                     | 8 (8.2)       | 3 (5.0)      | 0 (0.0)       | 1 (10.0)     | 4 (23.5)     |
| Stage III                                    | 27 (27.8)     | 13 (21.7)    | 8 (72.7)**2   | 5 (50.0)     | 2 (11.8)     |
| Stage IV (metastases)                        | 47 (48.5)     | 34 (56.7)    | 3 (27.3)      | 4 (40.0)     | 6 (35.3)     |
| unknown                                      | 2 (2.1)       | 1 (1.7)      | 0 (0.0)       | 0 (0.0)      | 1 (5.9)      |
| <b>Site of metastases</b>                    |               |              |               |              |              |
| Lung / Pleura / Pericardium (M1a)            | 36 (37.1)     | 26 (43.3)    | 3 (27.3)      | 3 (30.0)     | 4 (23.5)     |
| Brain                                        | 0 (0.0)       | 0 (0.0)      | 0 (0.0)       | 0 (0.0)      | 0 (0.0)      |
| Other distant metastases (M1b) <sup>11</sup> | 25 (25.8)     | 20 (33.3)    | 1 (9.1)       | 2 (20.0)     | 2 (11.8)     |
| <b>Treatment</b>                             |               |              |               |              |              |
| Treatment naive                              | 37 (38.1)     | 25 (41.7)    | 3 (27.3)      | 2 (20.0)     | 7 (41.2)     |

|                                                   |                 |                |                         |                         |               |
|---------------------------------------------------|-----------------|----------------|-------------------------|-------------------------|---------------|
| Chemotherapy (prior and/or current) <sup>12</sup> | 34 (35.1)       | 19 (31.7)      | 6 (54.5)                | 6 (60.0)                | 4 (23.5)      |
| Radiotherapy (radiation of primary tumor)         | 26 (26.8)       | 16 (26.7)      | 3 (27.3)                | 3 (30.0)                | 5 (29.4)      |
| Surgery of primary tumor <sup>13</sup>            | 25 (25.8)       | 12 (20.0)      | 3 (27.3)                | 4 (40.0)                | 6 (35.3)      |
| Surgery of metastases                             | 4 (4.1)         | 4 (44.4)       | 0 (0.0)                 | 0 (0.0)                 | 0 (0.0)       |
| Targeted Therapy <sup>14</sup>                    | 3 (3.1)         | 1 (1.7)        | 0 (0.0)                 | 2 (20.0)** <sup>7</sup> | 0 (0.0)       |
| Immunotherapy (IVIGs)                             | 2 (2.1)         | 0 (0.0)        | 1 (9.1)* <sup>3</sup>   | 1 (10.0)* <sup>8</sup>  | 0 (0.0)       |
| <b>Time since initial diagnosis (months)</b>      |                 |                |                         |                         |               |
| Median (range / IQR)                              | 1 (0-123 / 0-4) | 1 (0-25 / 0-3) | 2 (0-25 / 0-5)          | 2 (0-123 / 0-3)         | 1 (0-91/ 0-8) |
| <b>Other current/ prior malignancy in history</b> |                 |                |                         |                         |               |
| Yes                                               | 17 (17.5)       | 8 (13.3)       | 2 (18.2)                | 3 (30.0)                | 5 (29.4)      |
| <i>Lung Cancer<sup>15</sup></i>                   | 3 (3.1)         | 0 (0.0)        | 0 (0.0)                 | 0 (0.0)                 | 3 (17.6)      |
| <i>Other type of malignancy</i>                   | 14 (14.4)       | 8 (13.3)       | 2 (18.2)                | 3 (30.0)                | 2 (11.8)      |
| <b>Medical history</b>                            |                 |                |                         |                         |               |
| Smoking (n=92) <sup>16</sup>                      | 84 (91.3)       | 51 (91.0)      | 9 (81.8)                | 9 (90.0)                | 16 (94.1)     |
| <i>Pack years (median, range)</i>                 | 40 (5-100)      | 40 (6-100)     | 40 (5-90)               | 30 (20-46)              | 45 (5-70)     |
| Arterial hypertension                             | 61 (62.9)       | 35 (58.3)      | 8 (72.2)                | 6 (60.0)                | 13 (76.5)     |
| Pulmonary disease                                 | 50 (51.5)       | 31 (51.7)      | 4 (36.4)                | 5 (50.0)                | 10 (58.8)     |
| Cardiovascular disease                            | 42 (42.3)       | 25 (41.7)      | 5 (45.5)                | 3 (30.0)                | 9 (52.9)      |
| Gastrointestinal disease                          | 30 (30.9)       | 16 (26.7)      | 4 (36.4)                | 3 (30.0)                | 7 (41.2)      |
| Neurologic disease                                | 20 (20.6)       | 12 (20.0)      | 5 (45.5)                | 4 (40.0)                | 0 (0.0)       |
| Diabetes mellitus                                 | 25 (25.8)       | 18 (30.0)      | 2 (18.2)                | 2 (20.0)                | 3 (17.6)      |
| Urologic/ Nephrologic disease                     | 23 (23.7)       | 14 (23.3)      | 4 (36.4)                | 3 (30.0)                | 2 (11.8)      |
| Thyroid disease                                   | 25 (25.8)       | 17 (28.3)      | 5 (45.5)                | 2 (20.0)                | 2 (11.8)      |
| Psychiatric disease                               | 12 (12.4)       | 7 (11.7)       | 2 (18.2)                | 1 (10.0)                | 3 (17.6)      |
| Autoimmune disease                                | 5 (5.2)         | 1 (1.7)        | 2 (18.2)* <sup>4</sup>  | 1 (10.0)                | 1 (5.9)       |
| Rheumatic disease                                 | 3 (3.1)         | 0 (0.0)        | 1 (9.1)* <sup>5</sup>   | 1 (10.0)* <sup>9</sup>  | 1 (5.9)       |
| Paraneoplastic disease                            | 7 (7.2)         | 2 (3.3)        | 5 (45.5)** <sup>6</sup> | 1 (10.0)                | 0 (0.0)       |

|                             |         |         |          |         |         |
|-----------------------------|---------|---------|----------|---------|---------|
| <i>Antibody-related PNS</i> | 4 (4.1) | 0 (0.0) | 4 (36.4) | 0 (0.0) | 0 (0.0) |
| <i>SIADH</i>                | 2 (2.1) | 1 (1.7) | 1 (9.1)  | 0 (0.0) | 0 (0.0) |
| <i>Hypercalcemia</i>        | 1 (1.0) | 1 (1.7) | 0 (0.0)  | 0 (0.0) | 0 (0.0) |
|                             |         |         |          |         |         |

C-: negative control group (cell based assay and immunohistochemistry negative. AICAbs: patients positive for intracellular antibodies in cell based assay. NSAbs: patients positive for neuronal surface antibodies in cell based assay. uAbs: patients negative in cell based assay, but with positive immunohistochemistry (unidentified target antigen). Numbers do not add up due to combination of antibodies (1 patient is positive for both AICAbs and NSAbs). Significant differences between groups are marked with asterisks (\*\*\*<sup>1</sup> p<0.001, \*\*<sup>2</sup> p=0.008, \*<sup>3</sup> p=0.019, \*<sup>4</sup> p=0.012, \*<sup>5</sup> p=0.019, \*<sup>6</sup> p<0.001, \*\*<sup>7</sup> p=0.002, \*<sup>8</sup> p=0.014, \*<sup>9</sup> p=0.014). P-values are computed using chi-square test comparing against the C- group. Only significant p-values are displayed. <sup>10</sup>Typical Carcinoid Tumor 2 (2.1), Atypical Carcinoid Tumor 1 (1.0), NSCLC not otherwise specified 10 (10.3); <sup>11</sup>Current chemotherapy 24 (24.7); <sup>12</sup>Resection margin R0 19 (19.6), Resection margin R1 3 (3.1), unknown 3 (3.1); <sup>13</sup>Bevacizumab (VEGF-antibody) 1 (1.0), Cetuximab 1 (1.0), Everolimus 1 (1.0); <sup>14</sup>In History (cured) 3 (3.1). <sup>15</sup>Data on smoking are missing for 5 patients.

**eTable 5.** Demographic Characteristics of Patients by Cognitive Impairment

|                                      | No Cognitive Impairment (n=32) | Cognitive Impairment (n=65) | Total (n=97)           |
|--------------------------------------|--------------------------------|-----------------------------|------------------------|
| <b>Lung cancer subtype</b>           |                                |                             |                        |
| SCLC                                 | 10 (31.2%)                     | 16 (24.6%)                  | 26 (26.8%)             |
| NSCLC                                | 22 (68.8%)                     | 49 (75.4%)                  | 71 (73.2%)             |
| <b>Sex</b>                           |                                |                             |                        |
| Male                                 | 17 (53.1%)                     | 39 (60.0%)                  | 56 (57.7%)             |
| Female                               | 15 (46.9%)                     | 26 (40.0%)                  | 41 (42.3%)             |
| <b>Age</b>                           |                                |                             |                        |
| Median (IQR)                         | 58.00 (51.00, 65.25)           | 66.00 (62.00, 72.00)        | 64.00 (58.00, 69.00)   |
| <b>Treatment with opioids</b>        |                                |                             |                        |
| No                                   | 23 (71.9%)                     | 45 (69.2%)                  | 68 (70.1%)             |
| Yes                                  | 9 (28.1%)                      | 20 (30.8%)                  | 29 (29.9%)             |
| <b>MWTA Test IQ</b>                  |                                |                             |                        |
| Median (IQR)                         | 111.00 (99.50, 123.00)         | 108.00 (98.00, 115.00)      | 108.00 (98.00, 115.00) |
| Missing                              | 0 (0%)                         | 2 (3.08%)                   | 2 (2.06%)              |
| <b>SF-12 physical health (score)</b> |                                |                             |                        |
| Median (IQR)                         | 41.92 (30.99, 50.66)           | 35.09 (25.98, 41.59)        | 36.59 (29.29, 44.66)   |
| Missing                              | 2 (6.25%)                      | 1 (1.54%)                   | 3 (3.09%)              |
| <b>SF-12 mental health (score)</b>   |                                |                             |                        |
| Median (IQR)                         | 48.62 (40.94, 56.08)           | 46.83 (38.98, 59.42)        | 46.88 (39.19, 57.79)   |
| Missing                              | 2 (6.25%)                      | 1 (1.54%)                   | 3 (3.09%)              |
| <b>BDI-FS Score</b>                  |                                |                             |                        |
| Median (IQR)                         | 1.00 (0.00, 2.75)              | 2.00 (0.00, 3.00)           | 2.00 (0.00, 3.00)      |
| Missing                              | 2 (6.25%)                      | 1 (1.54%)                   | 3 (3.09%)              |

|                                    |            |            |            |
|------------------------------------|------------|------------|------------|
| <b>Chemotherapy</b>                |            |            |            |
| No                                 | 18 (56.2%) | 45 (69.2%) | 63 (64.9%) |
| Yes                                | 14 (43.8%) | 20 (30.8%) | 34 (35.1%) |
| <b>Radiotherapy</b>                |            |            |            |
| No                                 | 24 (75.0%) | 47 (72.3%) | 71 (73.2%) |
| Yes                                | 8 (25.0%)  | 18 (27.7%) | 26 (26.8%) |
| <b>Surgery</b>                     |            |            |            |
| No                                 | 21 (65.6%) | 51 (78.5%) | 72 (74.2%) |
| Yes                                | 11 (34.4%) | 14 (21.5%) | 25 (25.8%) |
| <b>Stage of Lung Cancer (I-IV)</b> |            |            |            |
| Stage I                            | 3 (9.4%)   | 10 (15.9%) | 13 (13.7%) |
| Stage II                           | 1 (3.1%)   | 7 (11.1%)  | 8 (8.4%)   |
| Stage III                          | 13 (40.6%) | 14 (22.2%) | 27 (28.4%) |
| Stage IV                           | 15 (46.9%) | 32 (50.8%) | 47 (49.5%) |
| Unknown                            | 0 (0%)     | 2 (3.08%)  | 2 (2.06%)  |



**eTable 6.** Cognitive Test Scores of Patients With SCLC: AIC Antibodies vs No Antibodies

|                            |                                       | <b>AICAb patients<br/>mean t-score</b> | <b>SEM</b> | <b>p</b>     |
|----------------------------|---------------------------------------|----------------------------------------|------------|--------------|
| <b>Overall cognition</b>   | <b>Composite cognitive score</b>      | -0.97                                  | 0.31       | <b>0.002</b> |
| <b>Verbal memory</b>       | <b>Immediate memory</b>               | -0.19                                  | 0.42       | 0.713        |
|                            | <b>Learning</b>                       | -2.55                                  | 1.04       | 0.057        |
|                            | <b>Sum Score</b>                      | -1.72                                  | 0.69       | <b>0.012</b> |
|                            | <b>Susceptibility to interference</b> | -1.34                                  | 0.71       | <b>0.046</b> |
|                            | <b>Delayed recall</b>                 | -2.26                                  | 0.71       | <b>0.002</b> |
| <b>Visuospatial memory</b> | <b>ROCF immediate recall</b>          | -0.16                                  | 0.51       | 0.795        |
|                            | <b>ROCF delayed recall</b>            | -0.34                                  | 0.56       | 0.544        |
| <b>Working memory</b>      | <b>Digit span forward</b>             | -0.46                                  | 0.43       | 0.398        |
|                            | <b>Digit span backward</b>            | -0.07                                  | 0.11       | 0.872        |
| <b>Attention</b>           | <b>Tonic alertness (time)</b>         | -2.88                                  | 0.82       | <b>0.015</b> |
|                            | <b>Tonic alertness (SD)</b>           | -2.87                                  | 1.07       | <b>0.043</b> |
|                            | <b>Phasic alertness (time)</b>        | -2.01                                  | 0.73       | <b>0.039</b> |
|                            | <b>Phasic alertness (SD)</b>          | -1.64                                  | 0.76       | <b>0.022</b> |
|                            | <b>Divided attention (auditive)</b>   | -0.46                                  | 0.60       | 0.488        |

|                           |                                      |       |      |       |
|---------------------------|--------------------------------------|-------|------|-------|
|                           | <b>Divided attention (visual)</b>    | -0.94 | 0.57 | 0.120 |
|                           | <b>Divided attention (errors)</b>    | 0.88  | 0.29 | 0.073 |
|                           | <b>Divided attention (omissions)</b> | -2.42 | 1.41 | 0.149 |
| <b>Executive function</b> | <b>Go/No Go (time)</b>               | -0.25 | 0.39 | 0.631 |
|                           | <b>Go/No Go (errors)</b>             | 0.01  | 0.42 | 0.980 |
|                           | <b>Go/No Go (omissions)</b>          | 0.27  | 0.30 | 0.570 |
|                           | <b>Stroop (time)</b>                 | -0.47 | 0.36 | 0.324 |
|                           | <b>Verbal fluency</b>                | -0.78 | 0.53 | 0.176 |

Significant differences in mean t-values were computed using t-test. Mean t-value of negative control group for all tests = 0 (SD =  $\pm 1.0$ ). Significant p-values are marked in bold. AICAbs: patients positive for intracellular antibodies in cell based assay. Neg. patients: negative control group (cell based assay and immunohistochemistry negative). SEM: Standard error of the mean.

**eTable 7.** Cognitive Test Scores of Patients With NSCLC: VLMT IgA NMDAR Antibodies vs No Antibodies

| NSCLC-patients: Cognitive test results NMDAR-IgA-Ab+ vs. Ab-negative |                                                     |                     |      |                      |      |               |
|----------------------------------------------------------------------|-----------------------------------------------------|---------------------|------|----------------------|------|---------------|
|                                                                      |                                                     | NMDAR-IgA-Ab+ (n=3) |      | Neg. patients (n=47) |      | p             |
|                                                                      |                                                     | Mean raw score      | SEM  | Mean raw score       | SEM  |               |
| Verbal memory                                                        | VLMT Score Trial 1 (immediate memory)               | 5.00                | 1.16 | 6.19                 | 0.31 | 0.347         |
|                                                                      | VLMT Score Trial 2                                  | 5.00                | 1.73 | 8.79                 | 0.37 | <b>0.017</b>  |
|                                                                      | VLMT Score Trial 3                                  | 6.67                | 1.67 | 10.62                | 0.40 | <b>0.019</b>  |
|                                                                      | VLMT Score Trial 4                                  | 8.67                | 0.88 | 11.26                | 0.42 | 0.128         |
|                                                                      | VLMT Score Trial 5 (best learning)                  | 9.33                | 1.45 | 11.89                | 0.37 | 0.093         |
|                                                                      | VLMT Sum Score (Trial 1-5)                          | 34.67               | 5.81 | 48.74                | 1.64 | <b>0.041*</b> |
|                                                                      | VLMT Score Trial 6 (susceptibility to interference) | 7.33                | 1.76 | 9.72                 | 0.50 | 0.246         |
|                                                                      | VLMT Score Trial 7 (Delayed recall)                 | 4.33                | 1.67 | 9.66                 | 0.49 | <b>0.011</b>  |
|                                                                      | VLMT Score Recognition                              | 4.33                | 4.91 | 12.30                | 0.42 | 0.246         |

Significant differences between mean raw scores were computed using T-test. Significant p-values are marked in bold. NMDAR-IgA-Ab+ = NMDAR-IgA antibody positive patients; Neg. patients = Antibody negative patients (in cell-based assay and immunohistochemistry). \*Sum score value not shown in figure 3A. SEM: standard error of the mean.

**eTable 8.** Cognitive Test Scores of All Patients With Lung Cancer: Unknown Antibodies vs No Antibodies

|                            |                                       | <b>uAbs patients mean t-score</b> | <b>SE</b> | <b>p</b>     |
|----------------------------|---------------------------------------|-----------------------------------|-----------|--------------|
| <b>Overall cognition</b>   | <b>Composite cognitive score</b>      | -0.44                             | 0.16      | <b>0.019</b> |
| <b>Verbal memory</b>       | <b>Immediate memory</b>               | -0.65                             | 0.18      | <b>0.014</b> |
|                            | <b>Learning</b>                       | -0.35                             | 0.28      | 0.226        |
|                            | <b>Sum Score</b>                      | -0.58                             | 0.25      | <b>0.039</b> |
|                            | <b>Susceptibility to interference</b> | -0.17                             | 0.19      | 0.518        |
|                            | <b>Delayed recall</b>                 | -0.19                             | 0.27      | 0.499        |
| <b>Visuospatial memory</b> | <b>ROCF immediate recall</b>          | -0.29                             | 0.24      | 0.289        |
|                            | <b>ROCF delayed recall</b>            | -0.34                             | 0.23      | 0.212        |
| <b>Working memory</b>      | <b>Digit span forward</b>             | -0.28                             | 0.31      | 0.337        |
|                            | <b>Digit span backward</b>            | -0.35                             | 0.23      | 0.195        |
| <b>Attention</b>           | <b>Tonic alertness (time)</b>         | -0.39                             | 0.34      | 0.197        |
|                            | <b>Tonic alertness (SD)</b>           | -0.57                             | 0.28      | 0.051        |
|                            | <b>Phasic alertness (time)</b>        | -0.23                             | 0.28      | 0.417        |
|                            | <b>Phasic alertness (SD)</b>          | -0.39                             | 0.33      | 0.192        |

|                           |                                      |       |      |              |
|---------------------------|--------------------------------------|-------|------|--------------|
|                           | <b>Divided attention (auditive)</b>  | 0.13  | 0.19 | 0.565        |
|                           | <b>Divided attention (visual)</b>    | -0.60 | 0.25 | <b>0.045</b> |
|                           | <b>Divided attention (errors)</b>    | -0.56 | 0.30 | 0.057        |
|                           | <b>Divided attention (omissions)</b> | -0.47 | 0.25 | 0.099        |
| <b>Executive function</b> | <b>Go/No Go (time)</b>               | -0.49 | 0.25 | 0.086        |
|                           | <b>Go/No Go (errors)</b>             | -0.08 | 0.27 | 0.776        |
|                           | <b>Go/No Go (omissions)</b>          | -1.22 | 0.60 | 0.064        |
|                           | <b>Stroop (time)</b>                 | -0.64 | 0.34 | <b>0.038</b> |
|                           | <b>Verbal fluency</b>                | -0.60 | 0.24 | <b>0.031</b> |

Significant differences between mean t-scores were computed using T-test. Mean t-value of negative control group for all tests = 0 (SD =  $\pm 1.0$ ). Significant p-values are marked in bold. uAbs=Patients with serum autoantibodies against brain tissue and yet unidentified target epitopes; Neg. patients = Antibody negative patients (in cell-based assay and immunohistochemistry). \*Sum score value not shown in figure 3A. SE: standard error of the mean, SD: standard deviation.

**eTable 9.** Model Adjusted for Opioid Therapy

|              |       | Model 1                       | Model 2                       |
|--------------|-------|-------------------------------|-------------------------------|
|              |       | OR (95% Credibility Interval) | OR (95% Credibility Interval) |
| Any antibody | SCLC  | 11.00 (1.16-103.78)           | 14.45 (1.35-154.40)           |
|              | NSCLC | 1.29 (0.38-4.39)              | 1.32 (0.37-4.63)              |
| AICABs       | SCLC  | 8.30 (0.74-92.44)             | 8.59 (0.77-96.94)             |
| NMDA IgA     | SCLC  | 2.89 (0.10-80.21)             | 5.12 (0.16-166.27)            |
|              | NSCLC | 15.72 (0.55-449.81)           | 16.44 (0.56-480.26)           |
| uAbs         | SCLC  | 8.51 (0.65-111.40)            | 13.10 (0.77-224.39)           |
|              | NSCLC | 2.62 (0.43-16.06)             | 2.79 (0.43-17.96)             |

Bayesian logistic regression models without (Model 1) and with adjustment (Model 2) for opioid analgesics: These analyses show that the additional adjustment for treatment with opioid analgesics did not relevantly alter our results and did not drive the observed association between neuronal autoantibodies and cognitive impairment.

**eTable 10.** Neuronal Autoantibodies and Neurological Deficits in Patients With Lung Cancer (n = 96)

| Neurological examination                | Total (n=96) | CBA- IHC- (n=59) | CBA + (n=20)* | p            | NSAbs (n=10)* | p            | AICAbs (n=11)* | p                | CBA- IHC+ (n=17) | p     |
|-----------------------------------------|--------------|------------------|---------------|--------------|---------------|--------------|----------------|------------------|------------------|-------|
| Abnormal neurological examination       | 61 (63.5)    | 33 (55.9)        | 15 (75.0)     | 0.131        | 7 (70.0)      | 0.405        | 9 (81.8)       | 0.108            | 13 (76.5)        | 0.127 |
| Cranial nerves                          |              |                  |               |              |               |              |                |                  |                  |       |
| Abnormal oculomotor function†           | 3 (3.1)      | 0 (0.0)          | 3 (15.0)      | <b>0.002</b> | 0 (0.0)       | .            | 3 (27.3)       | <b>&lt;0.001</b> | 0 (0.0)          | .     |
| Trigeminal hypesthesia                  | 3 (3.1)      | 1 (1.7)          | 2 (10.0)      | 0.093        | 0 (0.0)       | 0.678        | 2 (18.2)       | <b>0.013</b>     | 0 (0.0)          | 0.589 |
| Uni/bilateral hypacusis                 | 23 (23.7)    | 15 (25.4)        | 5 (25.0)      | 0.970        | 4 (40.0)      | 0.340        | 2 (18.2)       | 0.607            | 3 (17.6)         | 0.506 |
| Motor function                          |              |                  |               |              |               |              |                |                  |                  |       |
| Reduced muscle strength/paresis         | 2 (2.2)      | 0 (0.0)          | 2 (10.0)      | <b>0.026</b> | 1 (10.0)      | <b>0.037</b> | 2 (18.2)       | <b>0.003</b>     | 0 (0.0)          | .     |
| Abnormal muscle tone (rigor/spasticity) | 3 (3.1)      | 2 (3.4)          | 1 (5.0)       | 0.745        | 0 (0.0)       | 0.555        | 1 (9.1)        | 0.391            | 0 (0.0)          | 0.442 |
| Asymmetric reflexes                     | 8 (8.2)      | 5 (8.5)          | 2 (10.0)      | 0.836        | 1 (10.0)      | 0.874        | 1 (9.1)        | 0.947            | 1 (5.9)          | 0.727 |
| Missing reflexes                        | 24 (24.7)    | 16 (27.1)        | 6 (30.0)      | 0.804        | 4 (40.0)      | 0.406        | 3 (27.3)       | 0.992            | 2 (11.8)         | 0.109 |
| Babinski positive                       | 1 (1.0)      | 0 (0.0)          | 1 (5.0)       | 0.084        | 0 (0.0)       | .            | 1 (9.1)        | <b>0.020</b>     | 0 (0.0)          | .     |
| Sensory function                        |              |                  |               |              |               |              |                |                  |                  |       |
| Pallhyphaesthesia                       | 33 (34.0)    | 17 (28.8)        | 9 (45.0)      | 0.183        | 2 (25.0)      | 0.822        | 6 (54.5)       | 0.095            | 12 (48.0)        | 0.091 |
| Hypaesthesia upper/lower limb           | 13 (13.4)    | 6 (10.0)         | 5 (25.0)      | 0.092        | 1 (10.0)      | 1.000        | 4 (36.4)       | <b>0.021</b>     | 2 (11.8)         | 0.833 |
| Polyneuropathic symptoms§               | 22 (22.7)    | 11 (18.3)        | 9 (45.0)      | <b>0.017</b> | 3 (30.0)      | 0.393        | 6 (54.5)       | <b>0.010</b>     | 2 (11.8)         | 0.523 |
| Coordination                            |              |                  |               |              |               |              |                |                  |                  |       |
| Dysmetria in finger-nose-test           | 13 (13.4)    | 7 (11.7)         | 4 (20.0)      | 0.349        | 0 (0.0)       | 0.255        | 4 (36.4)       | <b>0.037</b>     | 2 (11.8)         | 0.991 |
| Balancing insecurity                    | 30 (30.9)    | 19 (34.5)        | 6 (30.0)      | 0.925        | 3 (33.3)      | 0.943        | 3 (27.3)       | 0.943            | 5 (29.4)         | 0.692 |
| Romberg trial positive                  | 4 (4.1)      | 3 (5.2)          | 1 (5.0)       | 0.701        | 0 (0.0)       | 0.682        | 1 (9.1)        | 0.732            | 0 (0.0)          | 0.456 |
| Cerebellar symptoms‡                    | 36 (37.1)    | 21 (35.0)        | 8 (40.0)      | 0.687        | 3 (30.0)      | 0.758        | 5 (45.5)       | 0.508            | 7 (41.2)         | 0.640 |

Abbreviations: CBA- IHC-: cell based assay negative and immunohistochemistry negative (= control group). CBA+: cell based assay positive (independent of IHC result). NSAbs: neuronal surface antibodies in CBA positive. AICAbs: Intracellular antibodies in CBA positive. CBA- IHC+: Cell based assay negative, immunohistochemistry positive (unidentified antigen). \*Numbers do not add up due to combination of antibodies (of the ten NSAb-positive patients, one patient is additionally AICAb-positive). Bold numbers represent a significant effect. P-values are computed with chi-square test. †: includes: saccaded pursuit movements, diplopia or combinations. §: includes: PNP diagnosis, pallhyphaesthesia, distal symmetric hypaesthesia or combinations. ‡: includes: dysmetria, dysdiadochokinesia, Romberg trial positive, balancing insecurity or combinations

**eFigure 1.** Antibody Prevalence

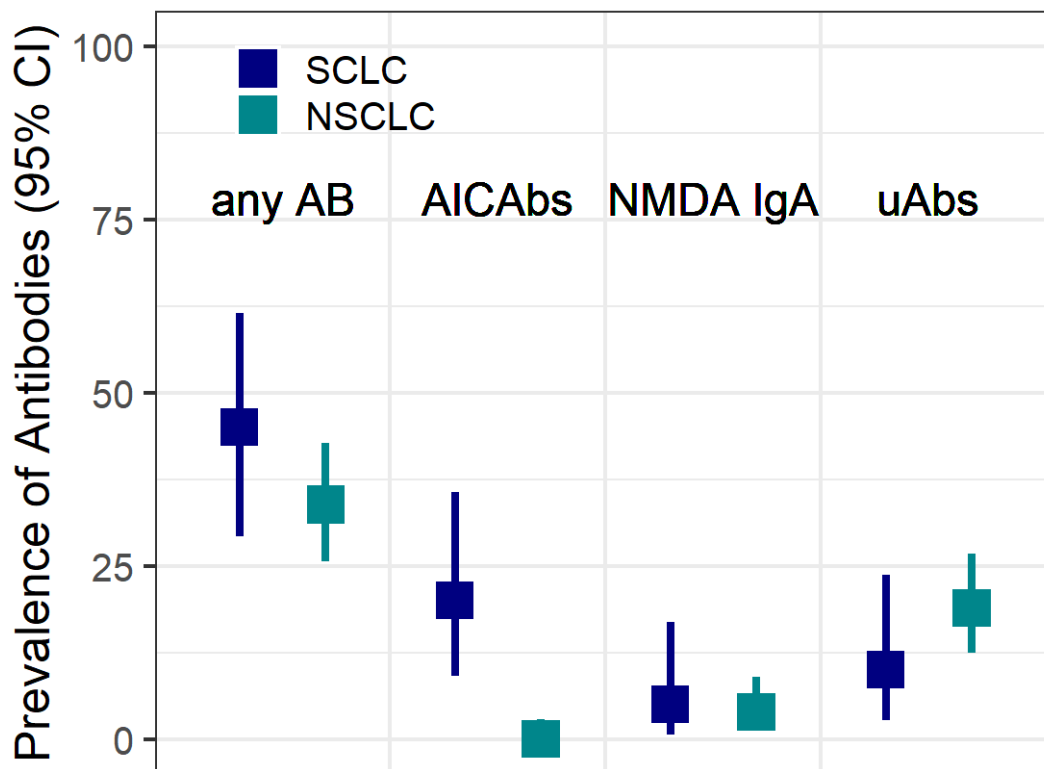

Antibody prevalence with 95% confidence intervals (95%CI) derived based on Clopper and Pearson.



**eFigure 2.** Antibody Prevalence by Sex

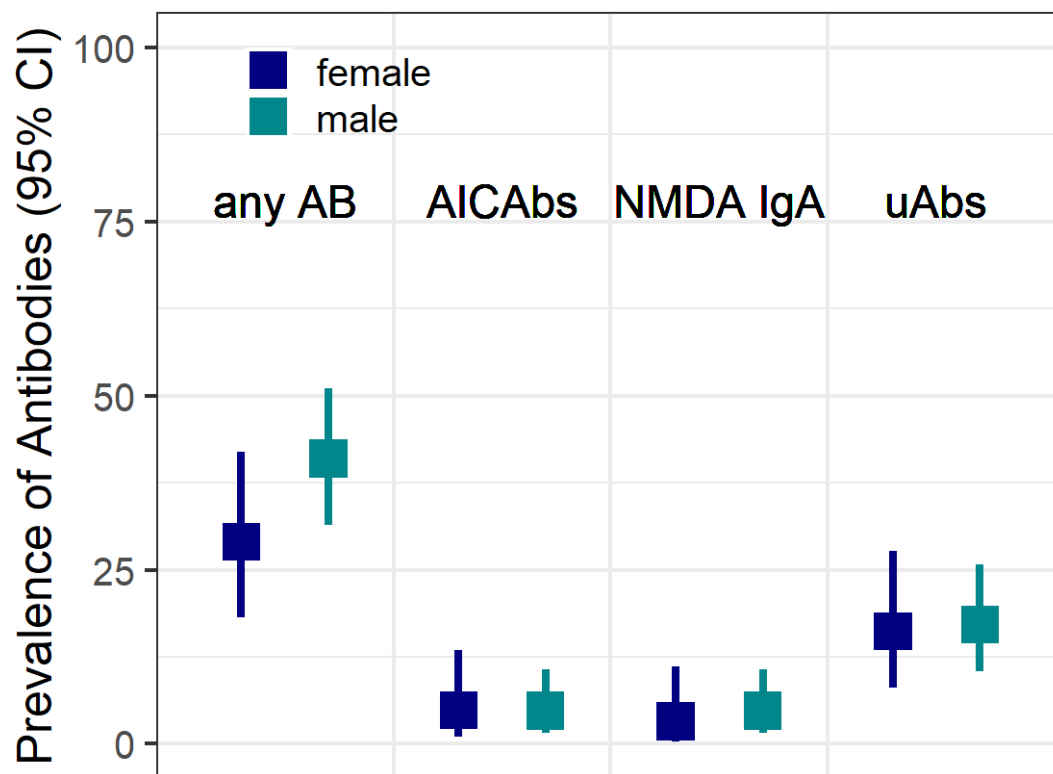

Antibody prevalence with 95% confidence intervals (95%CI) derived based on Clopper and Pearson.

eFigure 3. Cognitive Impairment by Sex

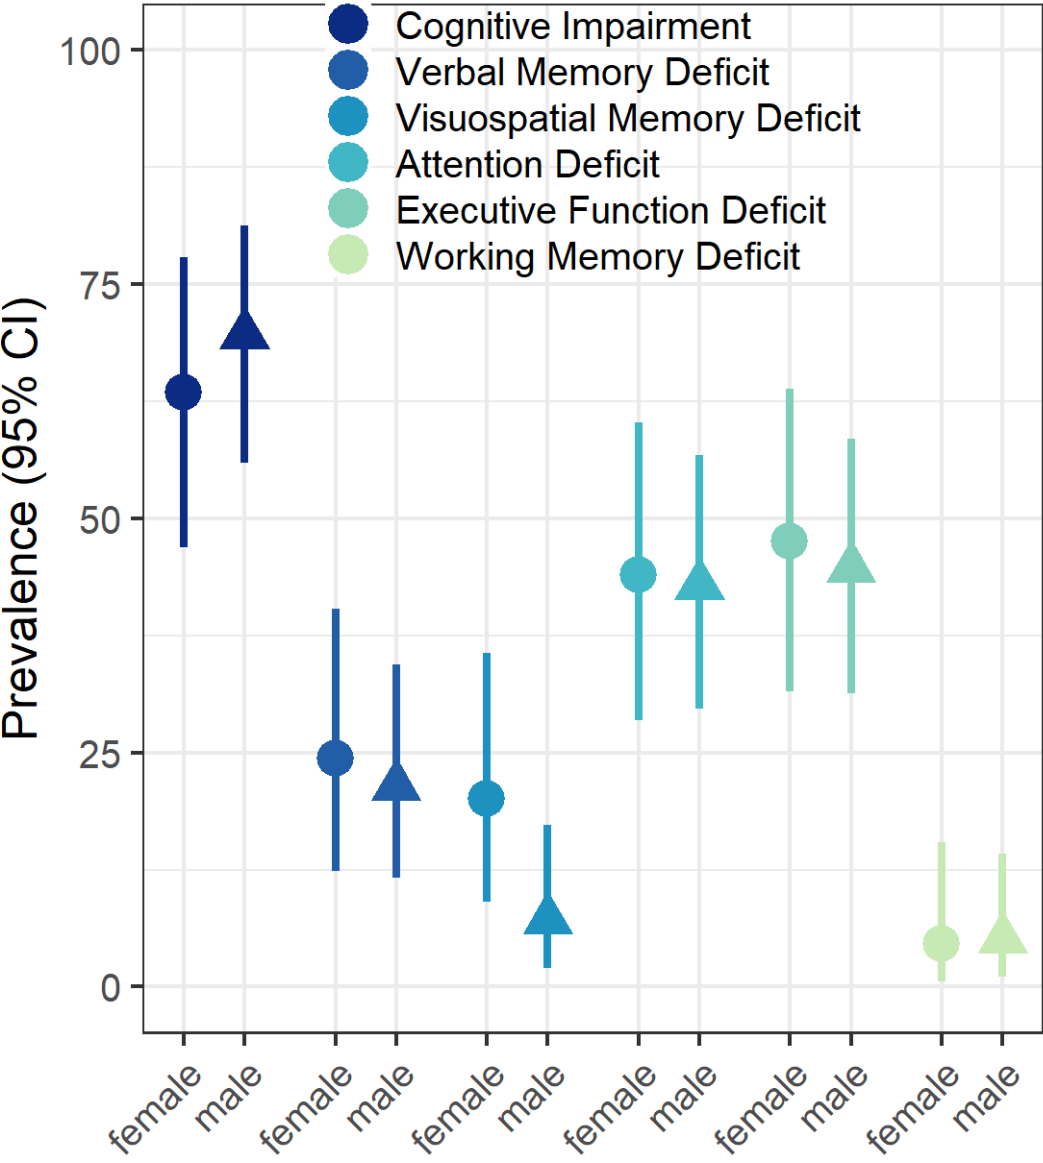

Prevalence of cognitive impairment and cognitive domain deficits with 95% confidence intervals (95%CI) derived based on Clopper and Pearson.

**eFigure 4.** Mental Health and Depression Scale Scores and Cognitive Impairment

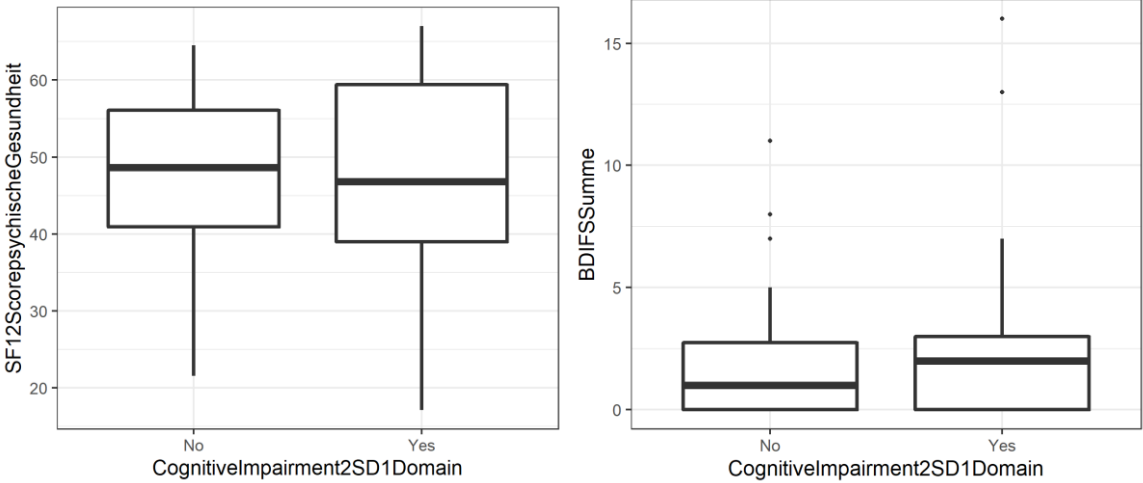

**eFigure 5.** Cognitive Domain Deficits: Working Memory, Visuospatial Memory, and Executive Function

**A: Working Memory**

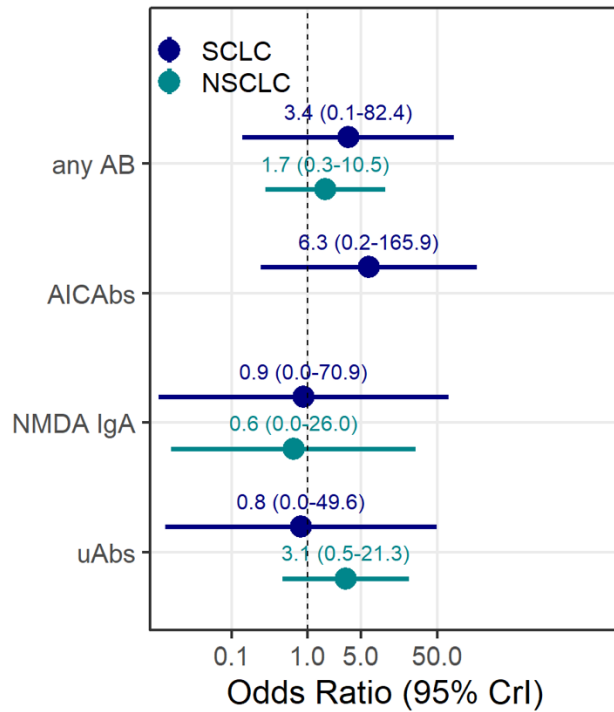

**B: Visuospatial Memory**

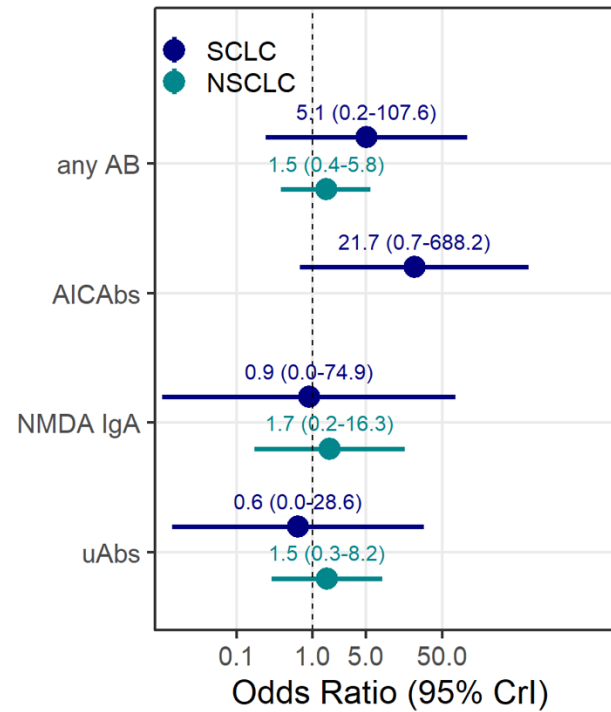

**C: Executive Function**

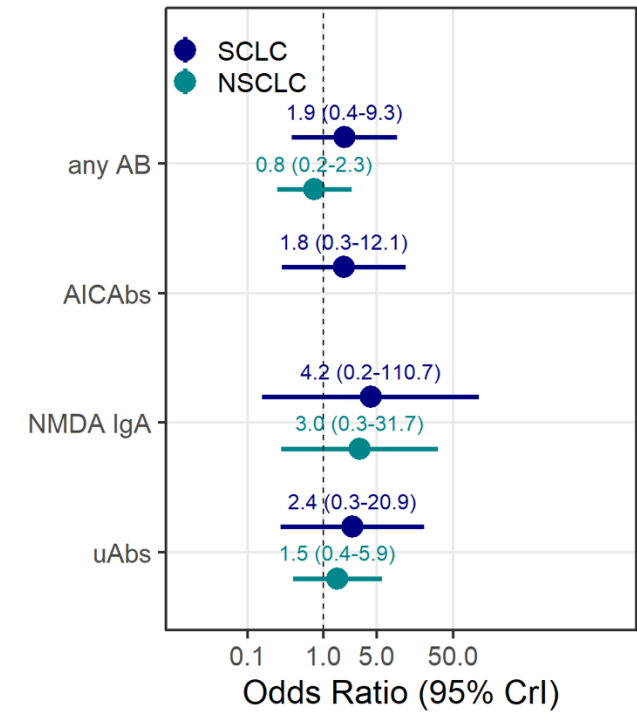

Odds ratio estimates with 95% credible intervals (CrI) based on Bayesian logistic regression models. Displayed are the derived estimates for the respective autoantibody compared to antibody-negative patients, where each model is adjusted for sex, age, and neurologic deficit. Outcome variables are the binary measures of **A)** Working Memory Deficit, **B)** Visuospatial Memory Deficit, and **C)** Executive Function Deficit.

**eFigure 6.** Verbal Memory Performance in Patients With IgA NMDAR Antibodies

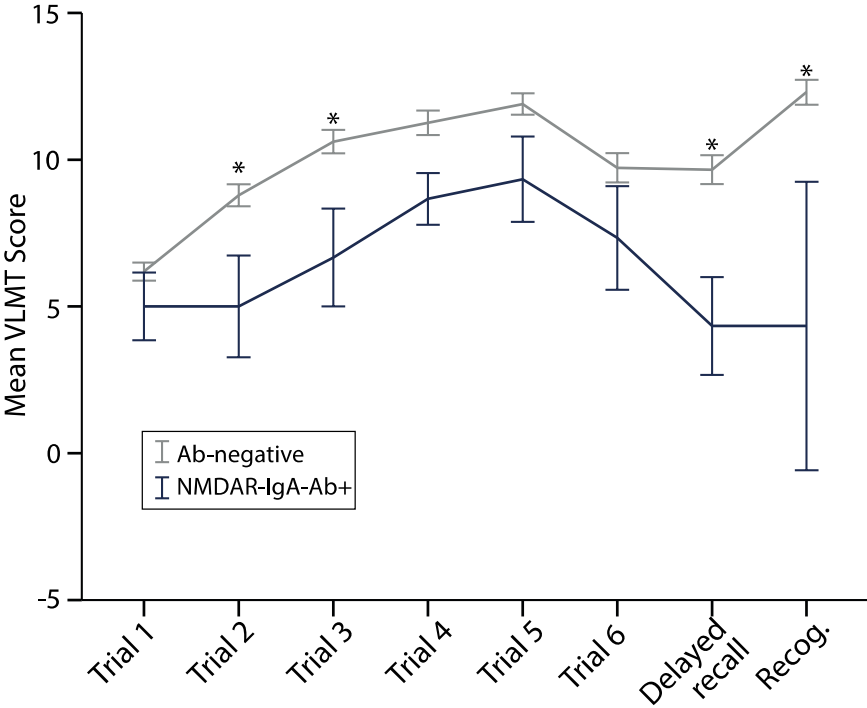

Comparison of verbal memory performance. Test raw scores of verbal learning memory task (VLMT) subtests are shown comparing patients with NMDAR IgA antibodies (n=3) vs. antibody-negative patients (n=47). Abbreviations: Mean VLMT Score = Mean score in the Verbal Learning and Memory Test; NMDAR-IgA-Ab+ = NMDAR-IgA antibody positive patients; Ab-negative = Antibody negative patients; Recog. = Recognition test score.

eFigure 7. Neurological Deficits

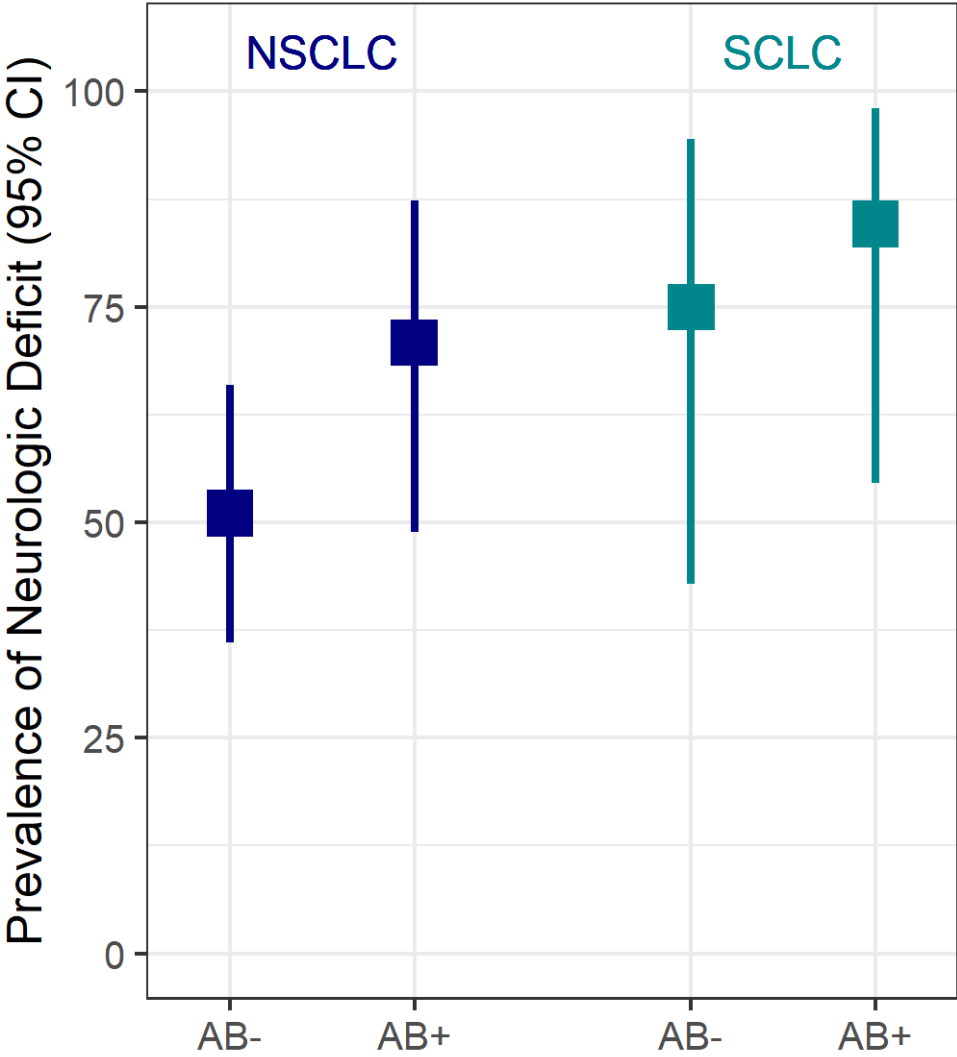

Prevalence of neurological deficits with 95% confidence intervals (95%CI) derived based on Clopper and Pearson.

## eReferences

1. Helmstaedter C, Lendt M, Lux S. *Verbaler Lern-und Merkfähigkeitstest (VLMT)*. Göttingen, Germany: Hogrefe; 2001.
2. Stern RA, Javorsky DJ, Singer EA, et al. *BQSS: the Boston Qualitative Scoring System for the Rey Osterrieth Complex Figure*. Odessa, FL: Psychological Assessment Resources Inc; 1999.
3. Zimmermann P, Fimm B. *Testbatterie zur Aufmerksamkeitsprüfung (TAP)—Test of Attentional Performance. Version 2*. 3rd ed. Herzogenrath, Germany: Psytest; 2012.
4. Aschenbrenner S, Tucha O, Lange KW. *Regensburg Word Fluency Test (Regensburger Wortflüssigkeits-Test [RWT])*. Göttingen, Germany: Hogrefe; 2000.
5. Horn W. *L-P-S Leistungsprüfsystem*. 2nd ed. Göttingen, Germany: Hogrefe; 1983.
6. Lehrl S. *Mehrfachwahl-Wortschatz-Intelligenz-Test, MWT-B*. 5th ed. Balingen, Germany: Spitta Verlag; 2005.
